# Supplementary material for: Co-occurring genomic alterations and immunotherapy efficacy in NSCLC
Source: PubMed Central journal article supplement (PMC8766442; doi:10.1038/s41698-021-00243-7), 2022-01-18
Supplement: 41698_2021_243_MOESM1_ESM.pdf [file 41698_2021_243_MOESM1_ESM.pdf]

# Supplemental Materials

Supplement to: F. Zhang, L. Zhao, T. Li, Y. Xu, et al.

Co-occurring genomic alterations impact immunotherapy efficacy in NSCLC

## TABLE OF CONTENTS

|                                                                                                                                                                                 |    |
|---------------------------------------------------------------------------------------------------------------------------------------------------------------------------------|----|
| Supplemental Methods .....                                                                                                                                                      | 2  |
| Outcomes .....                                                                                                                                                                  | 2  |
| Mutational analysis.....                                                                                                                                                        | 2  |
| Define the cut-off of the quantity of co-occurring mutations.....                                                                                                               | 2  |
| Definition of TMB>median and PD-L1 positivity in subgroup analysis and multivariable analysis .....                                                                             | 3  |
| Cell-type identification by estimating relative subsets of RNA transcripts (CIBERSORT).....                                                                                     | 3  |
| Analysis of predicted neoantigen load.....                                                                                                                                      | 3  |
| Figure legends of Supplemental Figures .....                                                                                                                                    | 4  |
| Supplemental Tables .....                                                                                                                                                       | 17 |
| Supplementary Table 1. Clinical cohorts analyzed in this study.....                                                                                                             | 17 |
| Supplementary Table 2. Members of the analyzed signaling pathways.....                                                                                                          | 18 |
| Supplementary Table 3. The single mutations associated with PFS on anti-PD-(L)1 monotherapy in non-squamous NSCLCs.....                                                         | 19 |
| Supplementary Table 4. The interaction effects of co-mutations associated with PFS on anti-PD-(L)1 monotherapy in non-squamous NSCLCs. ....                                     | 20 |
| Supplementary Table 5. The single mutations associated with PFS on anti-PD-(L)1 monotherapy in squamous NSCLCs.....                                                             | 21 |
| Supplementary Table 6. The interaction effects of co-occurring mutations associated with PFS on anti-PD-(L)1 monotherapy in non-squamous NSCLCs. ....                           | 22 |
| Supplementary Table 7. Univariable-significant single mutational events and significant interactions based on the PFS data of the non-squamous NSCLCs in the training sets..... | 23 |
| Supplementary Table 8. Three prediction models based on the PFS on anti-PD-(L)1 monotherapy of the non-squamous NSCLCs in the training sets. ....                               | 24 |
| Supplementary Table 9. Univariable-significant single mutational events and significant interactions based on the PFS data of the squamous NSCLCs in the training sets. ....    | 25 |
| Supplementary Table 10. Three prediction models based on the PFS on anti-PD-(L)1 monotherapy of the squamous NSCLCs in the training sets. ....                                  | 26 |
| References .....                                                                                                                                                                | 27 |

## Supplemental Methods

### Outcomes

Objective response rate (ORR) was defined as the percentage of patients with confirmed complete response (CR) or partial response (PR) according to Response Evaluation Criteria in Solid Tumors, version 1.1 (RECIST v1.1) by thoracic radiologists or investigators. PFS was defined as the time from the start of treatment until disease progression (RECIST v1.1) or death from any cause. Overall survival (OS) was defined as the time from the start of treatment to death or the date of the last follow-up.

### Mutational analysis

Mutated genes included in our analysis were restricted to non-silent mutations consisting of nonsense mutation, missense mutation, frameshift mutation, inframe mutation, splice site mutation, translation start site mutation, and nonstop mutation. Truncating mutations of oncogene were excluded because most of these are passenger mutations with limited cancer-promoting function.

The signaling pathways and their members analyzed in the present study are shown in **Supplemental Table S2**. This idea of pathway-level genomic alterations was derived from multi-omics studies<sup>1-3</sup>. Moreover, a study using similar concept was conducted to investigate the genomic correlates of PD-L1 expression in patients with lung adenocarcinomas<sup>4</sup>. The definition of pathways in the present study drew upon these previous works. In addition, we selected the genes that were detected in all the included cohorts.

### Define the cut-off of the quantity of co-occurring mutations

To reduce the sampling error of the data displayed in **Fig. 1**, we needed to set a cut-off value of the frequency of co-occurring mutations. The training cohort of non-squamous NSCLC (n=592) consists of two meta-datasets (1: MSKCC/DFCI/SYSUCC [n=288], 2: POPLAR/OAK [304]). We calculated the interaction effect of each co-mutated pair in each meta-dataset, and use the formula below to assess the difference between the interaction effects of each pair in the two meta-datasets.

$$\text{Difference value} = \text{Absolute value of } \log_2(\text{HR}_{\text{training set 1}}/\text{HR}_{\text{training set 2}})$$

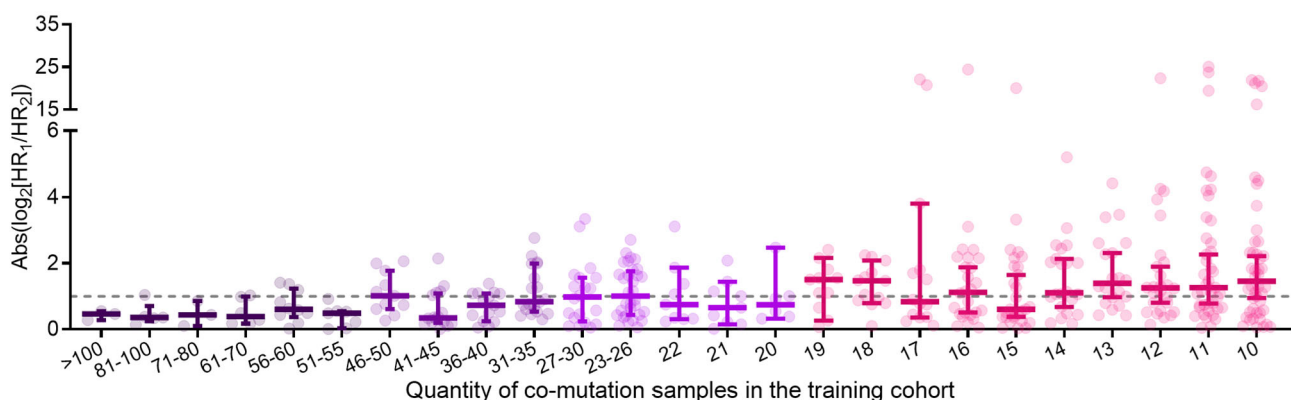

The medians of the difference value were mostly below 1 in the groups with  $\geq 20$  quantities of co-mutation samples, and the medians of the groups “quantity=19” and “quantity=18” increased to 1.51 and 1.47,

respectively. Moreover, several difference values over 15 were observed in the groups with  $\leq 17$  quantities of co-mutation samples. Taken together, these results indicate that the co-mutations existing in  $\geq 20$  patients in the training cohort exhibited more robustly in predicting ICI efficacy, and therefore we set the cut-off of the quantity of co-mutation as 20.

#### **Definition of TMB $>$ median and PD-L1 positivity in subgroup analysis and multivariable analysis**

As for TMB, the panels and the tested samples (tissue/blood) are not the same in different cohorts (**Supplemental Table S1**), but the distribution and the order of included patients may be largely similar owing to the high correlations between tTMB and bTMB and between different panels<sup>5-7</sup>. The similarity of distribution was further exemplified by the scatter plots in **Fig. 3J-L**. Given this, we used the median value in each cohort to classify the patients into the TMB $<$ median and the TMB $\geq$ median subgroups, and then separately combined all the TMB $<$ median subgroups and all the TMB $\geq$ median subgroups for further analysis.

Despite that the PD-L1 antibodies used for immunohistochemistry in the included cohorts are not identical (**Supplemental Table S1**), a combined analysis of PD-L1 positivity was implemented due to the concordance among these antibodies<sup>8,9</sup>.

#### **Cell-type identification by estimating relative subsets of RNA transcripts (CIBERSORT)**

CIBERSORT, an online method (<https://cibersort.stanford.edu/index.php>) for characterizing cell composition of complex tissues from their gene expression profiles<sup>10</sup>, was applied to the enumeration of hematopoietic subsets in mRNA mixtures from TCGA database. CIBERSORT outperformed other methods with respect to noise, unknown mixture content, and closely related cell types<sup>10</sup>.

#### **Analysis of predicted neoantigen load**

The data of predicted neoantigen load were retrieved from the MSKCC-34 and MSKCC-75 cohorts<sup>11,12</sup>. We performed Spearman correlation analysis to assess the association between the inter-score and neoantigen load.

## Supplemental Figures

Supplementary Fig. 1. PFS data of the included patients from different sources.

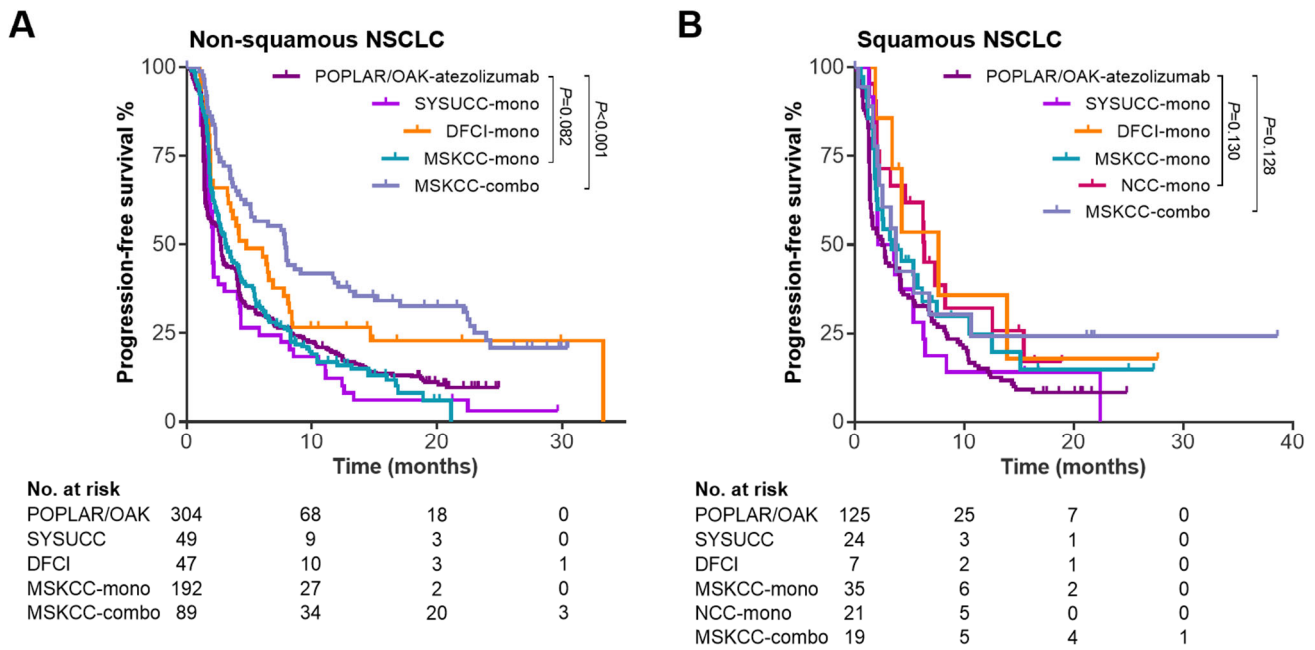

**A-B.** KM curves illustrating the PFS data from different sources of non-squamous and squamous NSCLC. Abbreviations: combo=combination therapy with anti-cytotoxic T lymphocyte antigen-4, DFCI=Dana Farber Cancer Institute, KM=Kaplan-Meier, mono=anti-programmed death-(ligand) 1 monotherapy, MSKCC=Memorial Sloan-Kettering Cancer Center, NCC=National Cancer Center, NSCLC=non-small cell lung cancer, PFS=progression-free survival, SYSUCC=Sun Yat-Sen University Cancer Center.

**Supplementary Fig. 2. Nomograms of the three models predicting the PFS on ICI therapy in the patients with non-squamous NSCLC.**

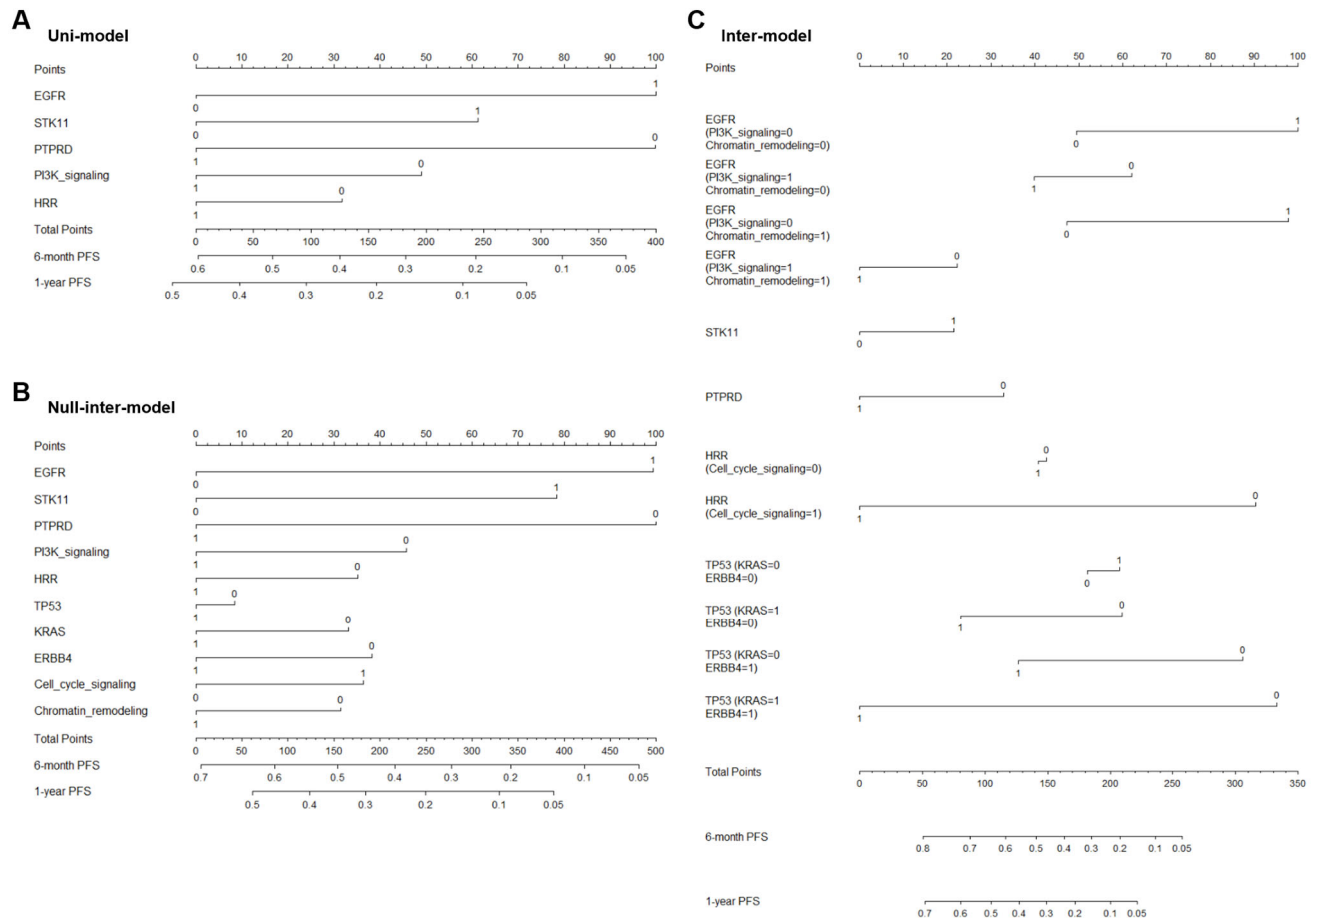

**A-C.** The nomograms of the uni-model (**A**), the null-inter-model (**B**), and the inter-model (**C**). Abbreviations: ICI=immune checkpoint inhibitor, NSCLC=non-small cell lung cancer.

**Supplementary Fig. 3. Performances of the three models in predicting objective response to ICI therapy in non-squamous NSCLC.**

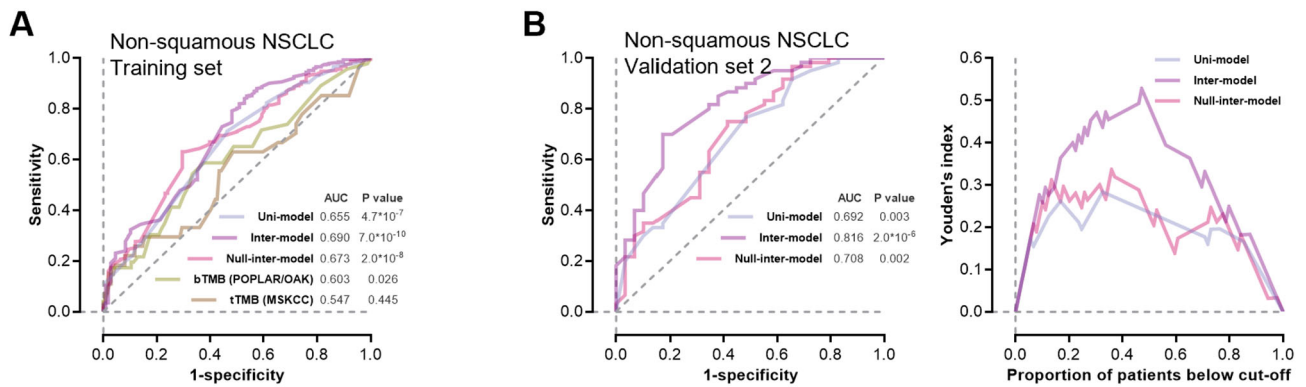

**A.** The ROC curves of response and the three scores, blood TMB, and tissue TMB in the training sets-1/2 of non-squamous NSCLC. **B.** The ROC curves of response and the three scores in the validation set-2 of non-squamous NSCLC (left) and the Youden's indices based on these ROC curves (right). Abbreviations: ICI=immune checkpoint inhibitor, NSCLC=non-small cell lung cancer, ROC=receiver operating characteristic, TMB=tumor mutational burden.

**Supplementary Fig. 4. Association between scores and prognosis in the POPLAR/OAK-docetaxel cohort and the TCGA-LUAD cohort.**

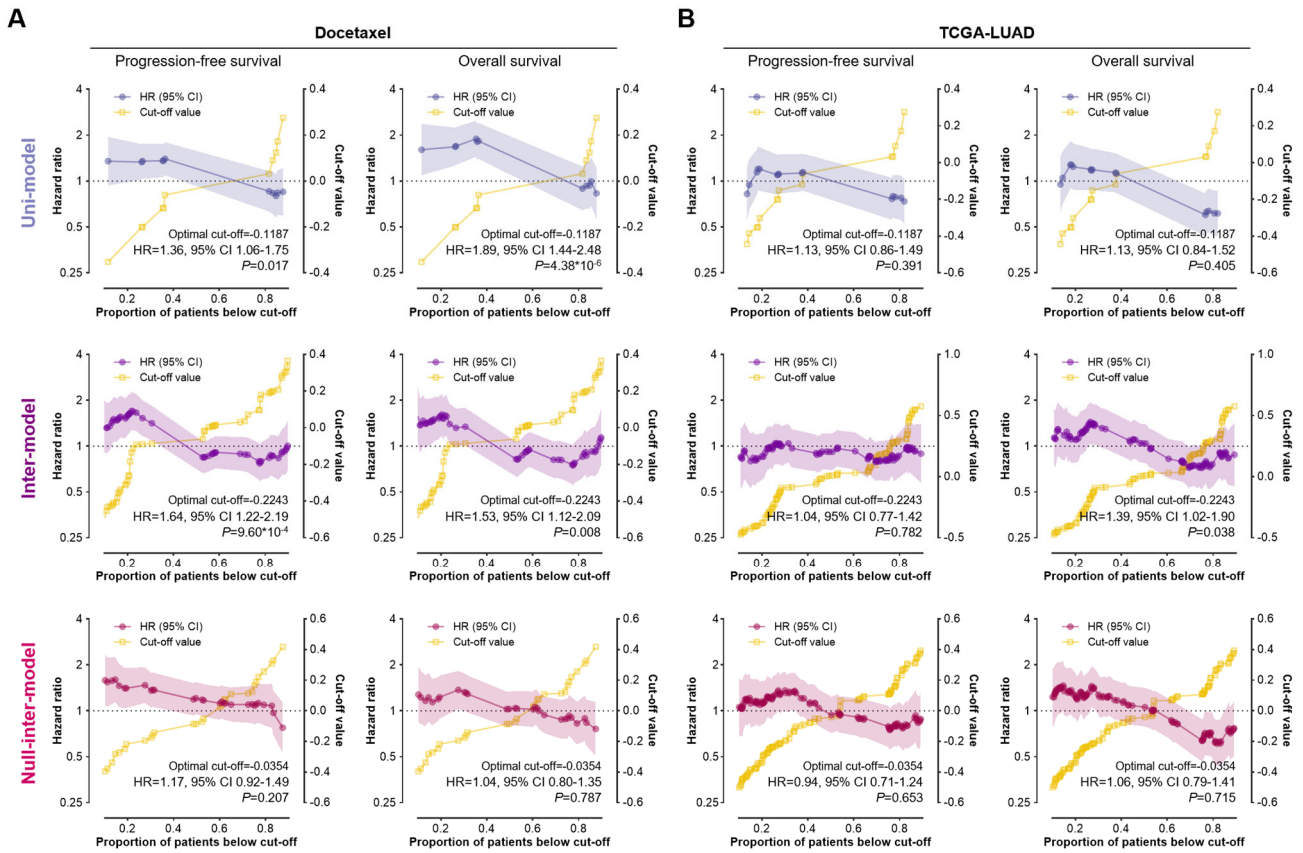

**A-B.** Associations between scores and survival outcomes with docetaxel (**A**) and prognosis in the TCGA cohort (**B**).

Abbreviations: LUAD=lung adenocarcinoma, NSCLC=non-small cell lung cancer, TCGA=The Cancer Genomic Atlas.

**Supplementary Fig. 5. Workflow of developing and validating three models in squamous NSCLC.**

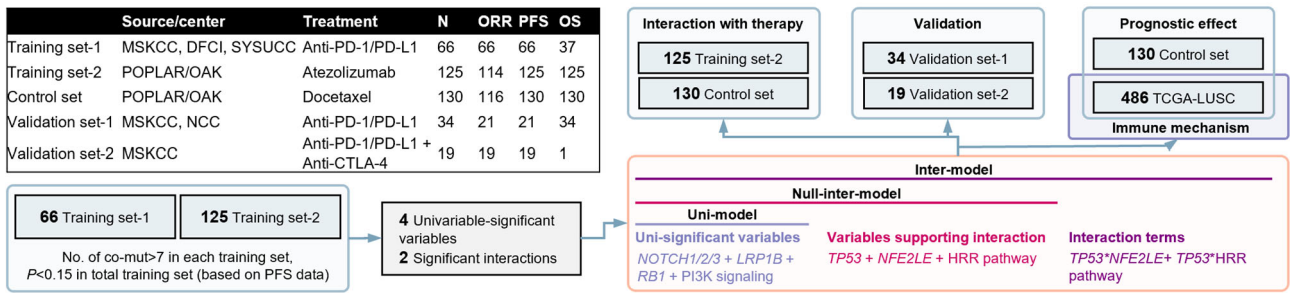

Abbreviations: DFCI=Dana Farber Cancer Institute, MSKCC=Memorial Sloan-Kettering Cancer Center, NCC=National Cancer Center, NSCLC=non-small cell lung cancer, OS=overall survival, PD-1=programmed death-1, PD-L1=programmed death-ligand 1, PFS=progression-free survival, SYSUCC=Sun Yat-Sen University Cancer Center.



**Supplementary Fig. 6. Nomograms of the three models predicting the PFS on ICI therapy in the patients with squamous NSCLC.**

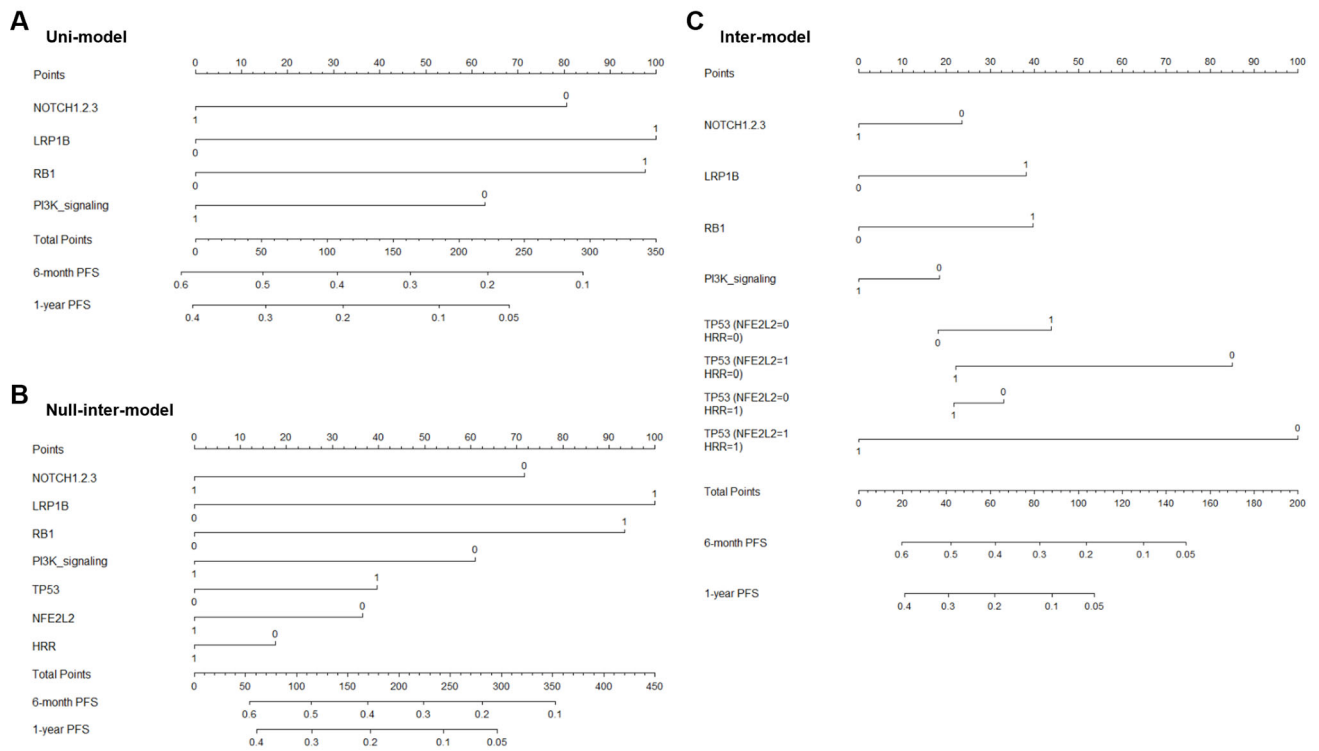

**A-C.** The nomograms of the uni-model (**A**), the null-inter-model (**B**), and the inter-model (**C**). Abbreviations: ICI=immune checkpoint inhibitor, NSCLC=non-small cell lung cancer.

**Supplementary Fig. 7. Performances of the three models in predicting objective response to ICI therapy in squamous NSCLC.**

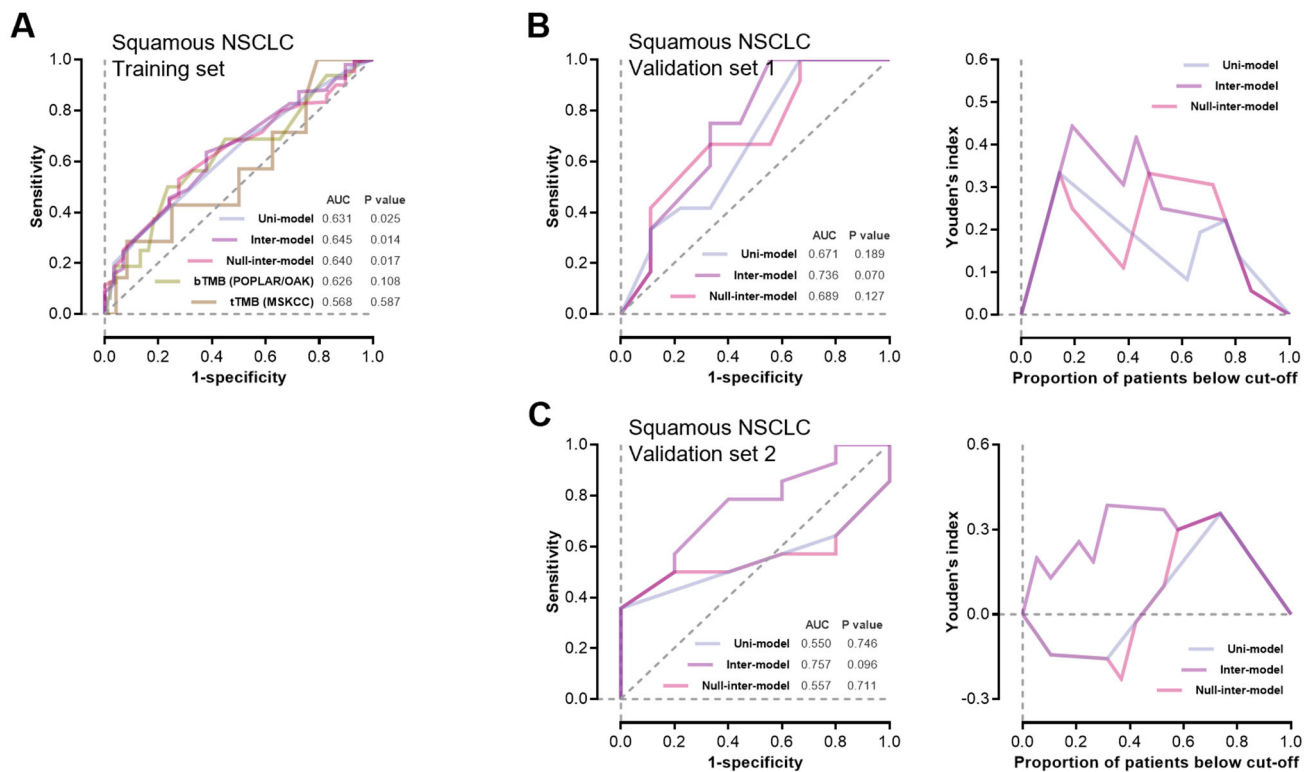

**A.** The ROC curves of response and the three scores, blood TMB, and tissue TMB in the training sets-1/2 of squamous NSCLC. **B.** The ROC curves of response and the three scores in the validation set-1 of non-squamous NSCLC (left) and the Youden's indices based on these ROC curves (right). **C.** The ROC curves of response and the three scores in the validation set-2 of non-squamous NSCLC (left) and the Youden's indices based on these ROC curves (right). Abbreviations: ICI=immune checkpoint inhibitor, NSCLC=non-small cell lung cancer, ROC=receiver operating characteristic, TMB=tumor mutational burden.

**Supplementary Fig. 8. Performances of the three-models in predicting PFS/OS on immunotherapy and PFS/OS benefit from atezolizumab over docetaxel in the training sets of squamous NSCLC.**

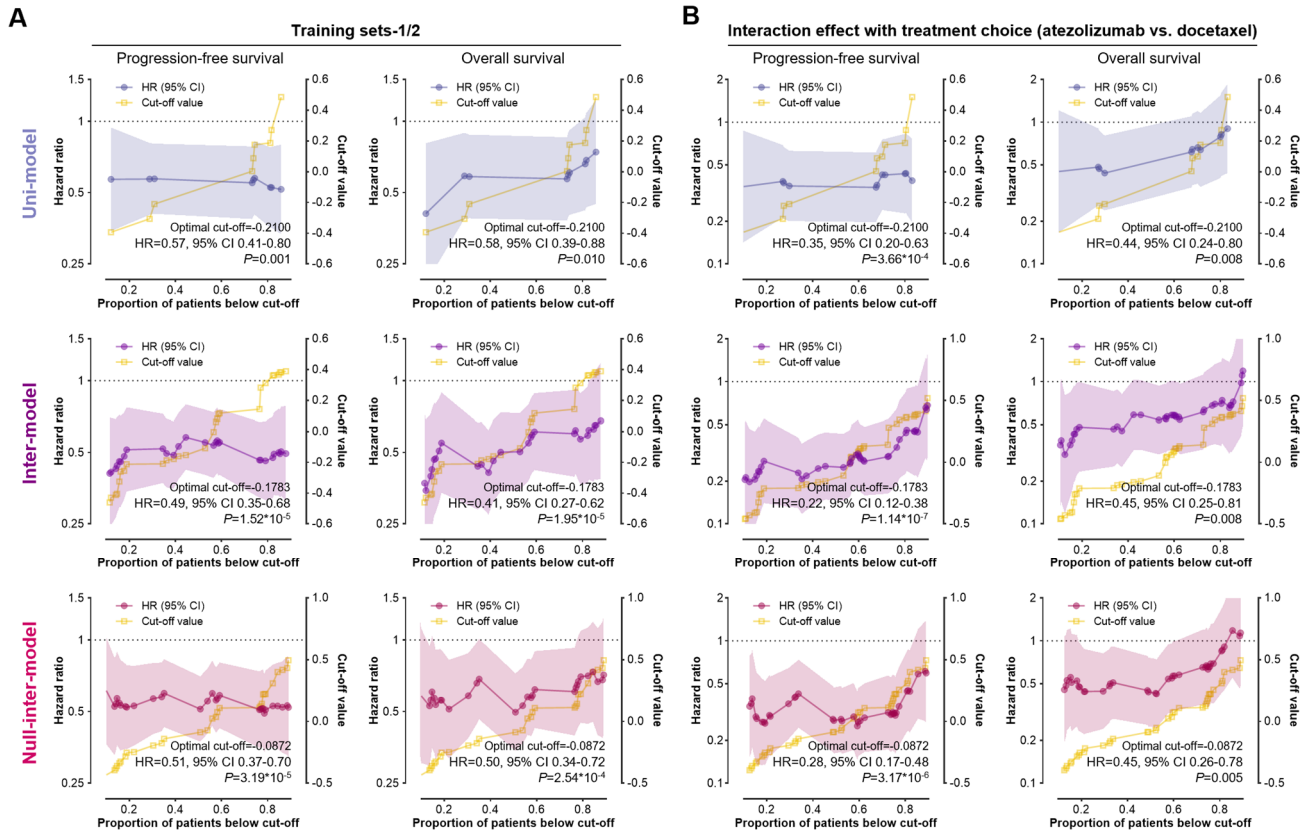

**A.** Performances of the three-models on discriminating the PFS and OS on anti-PD-(L)1 monotherapy in the training sets-1/2. **B.** Performances of the three-models on predicting the PFS and OS benefit from atezolizumab over docetaxel in the POPLAR/OAK cohort. Abbreviations: NSCLC=non-small cell lung cancer, OS=overall survival, PD-1=programmed death-1, PD-L1=programmed death-ligand 1, PFS=progression-free survival.

**Supplementary Fig. 9. Performances of the three models in predicting PFS/OS on ICI treatment in the validation sets of squamous NSCLC.**

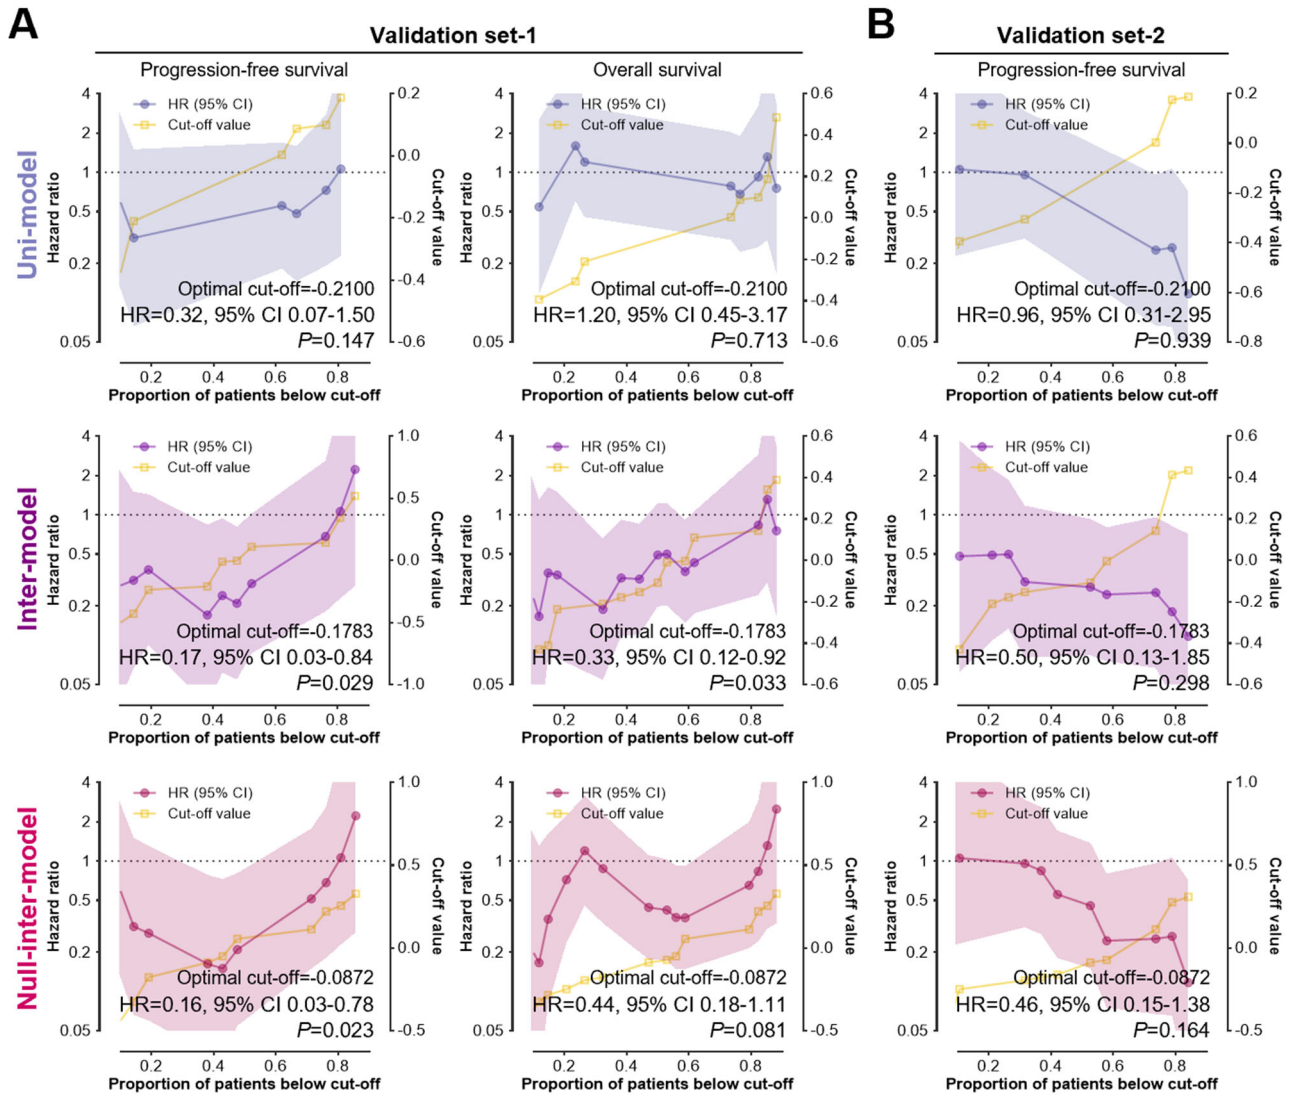

**A-B.** Performances of the three-models on discriminating the OS on anti-PD-(L)1 monotherapy in the validation set-1 (A) and the PFS on combination therapy with anti-CTLA-4 in the validation set-2 (B). Abbreviations: OS=overall survival, PD-1=programmed death-1, PD-L1=programmed death-ligand 1, PFS=progression-free survival.

**Supplementary Fig. 10. Association between scores and prognosis in the POPLAR/OAK-docetaxel cohort of squamous NSCLC and the TCGA-LUSC cohort.**

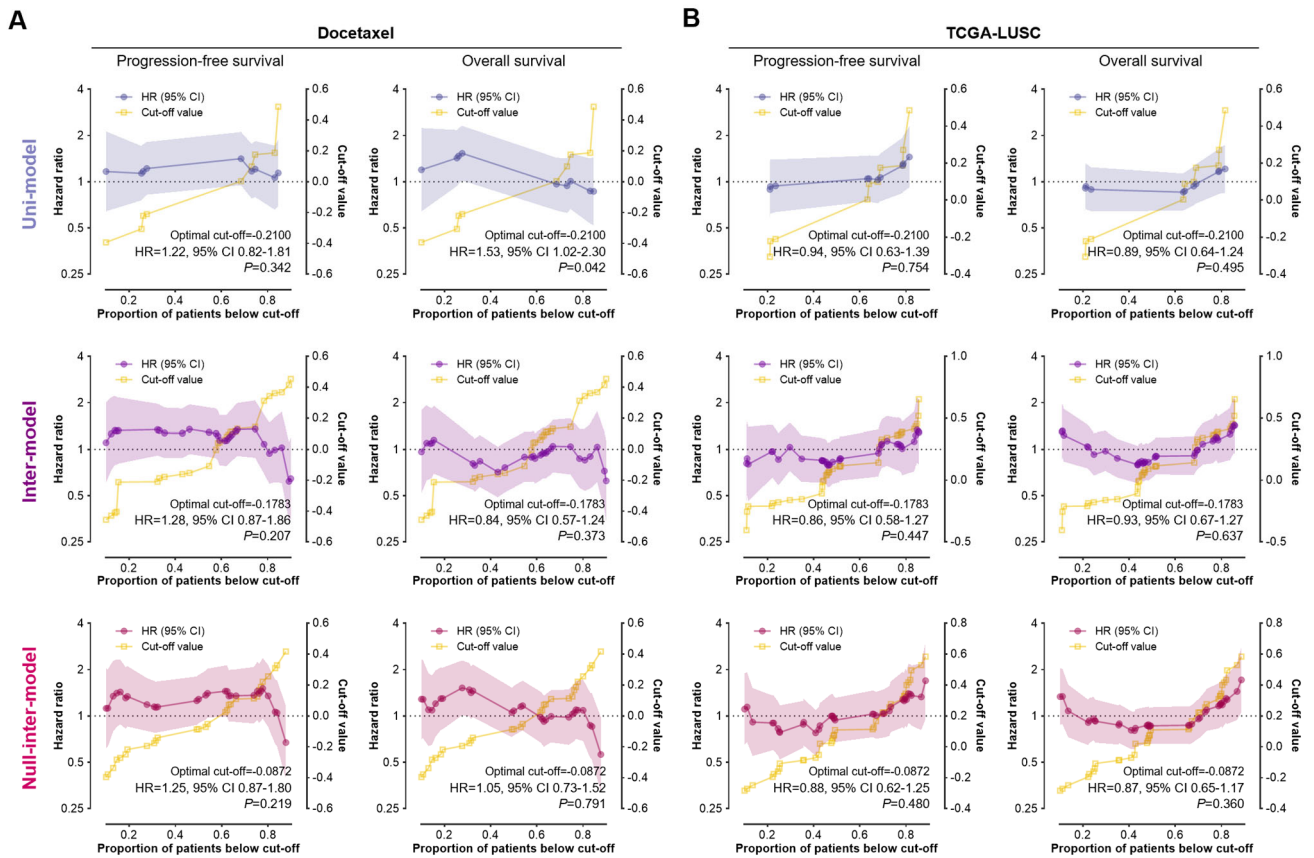

**A-B.** Associations between scores and survival outcomes with docetaxel (A) and prognosis in the TCGA cohort (B).

Abbreviations: LUSC=lung squamous cell carcinoma, NSCLC=non-small cell lung cancer, TCGA=The Cancer Genomic Atlas.

**Supplementary Fig. 11. Immune correlates of the inter-score in the TCGA-LUSC cohort.**

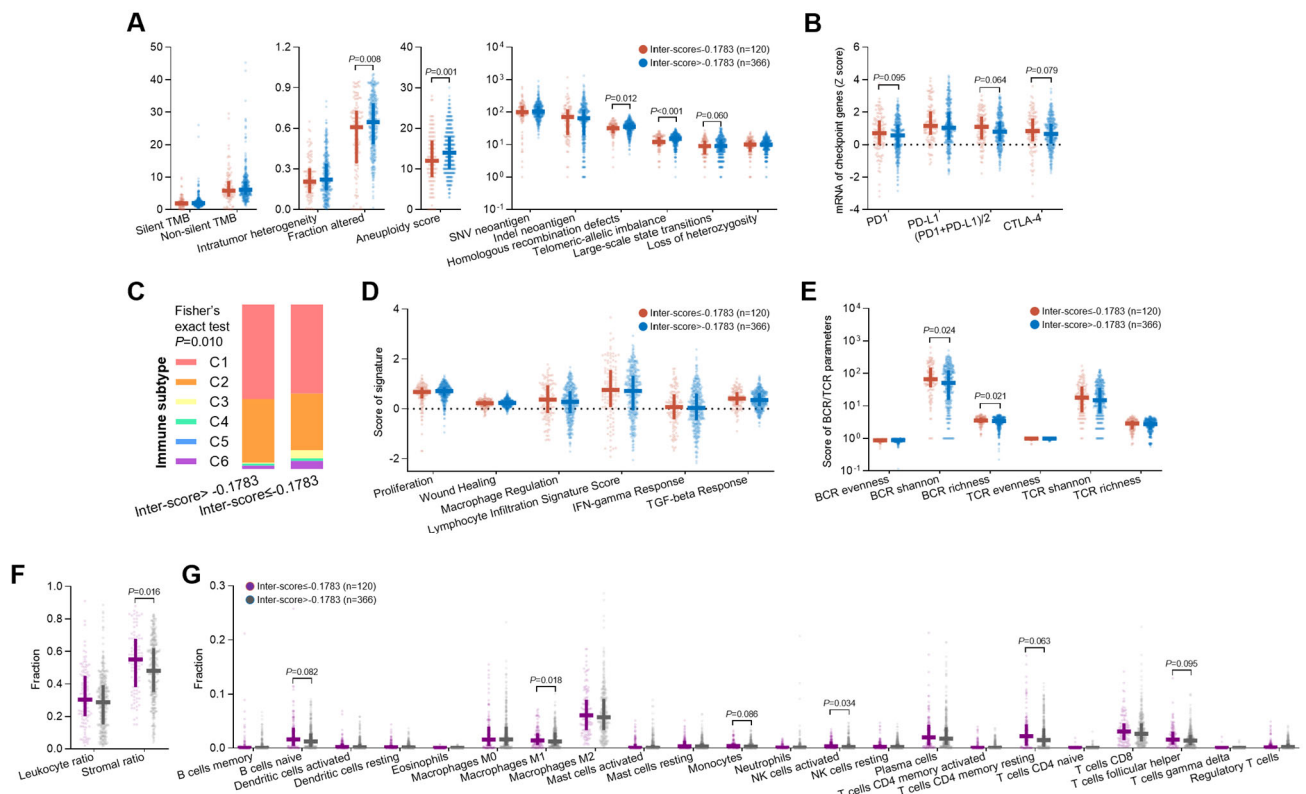

**A-G.** Associations of the inter-score with TMB, intratumor heterogeneity, fraction altered, aneuploidy score, neoantigen load, homologous recombination defects (A), mRNA of immune checkpoint genes (B), immune subtype (C), signatures supporting immune subtyping (D), and BCR/TCR parameters (E), leukocyte/stromal ratio (F), and tumor-infiltrating immune cells (G). Abbreviations: BCR=B cell receptor, LUSC=lung squamous cell carcinoma, SNV=single nucleotide variation, TCGA=The Cancer Genomic Atlas, TCR=T cell receptor, TMB=tumor mutational burden.

**Supplementary Fig. 12. Association of *KEAP1* mutation and *KRAS*-G12C mutation with immunotherapy efficacy in non-squamous NSCLC.**

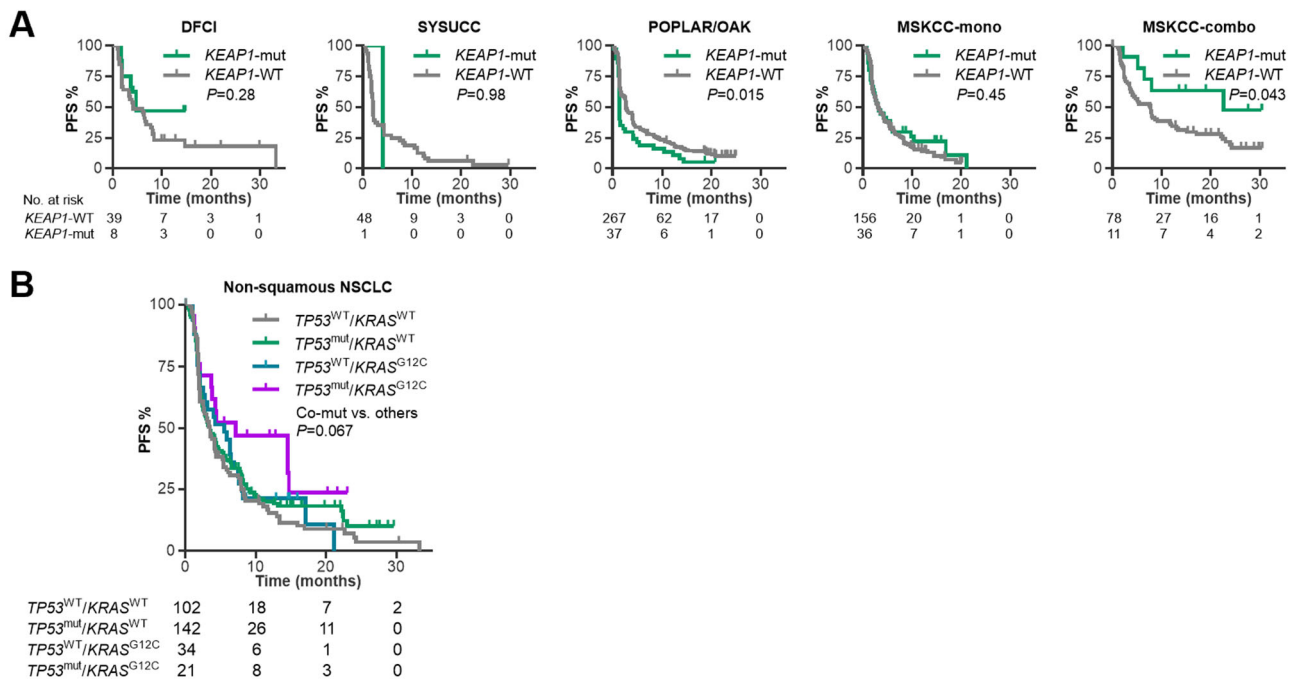

**A.** Association between *KEAP1* mutation and immunotherapy efficacy in non-squamous NSCLC. **B.** Association between *TP53/KRAS* co-mutation and immunotherapy efficacy in non-squamous NSCLC. Abbreviations: NSCLC=non-small cell lung cancer, PFS=progression-free survival.

**Supplementary Fig. 13. Association of the inter-score with tissue TMB $\geq$ 10 and PD-L1 $\geq$ 50% in predicting the PFS on ICI treatment in the patients with NSCLC.**

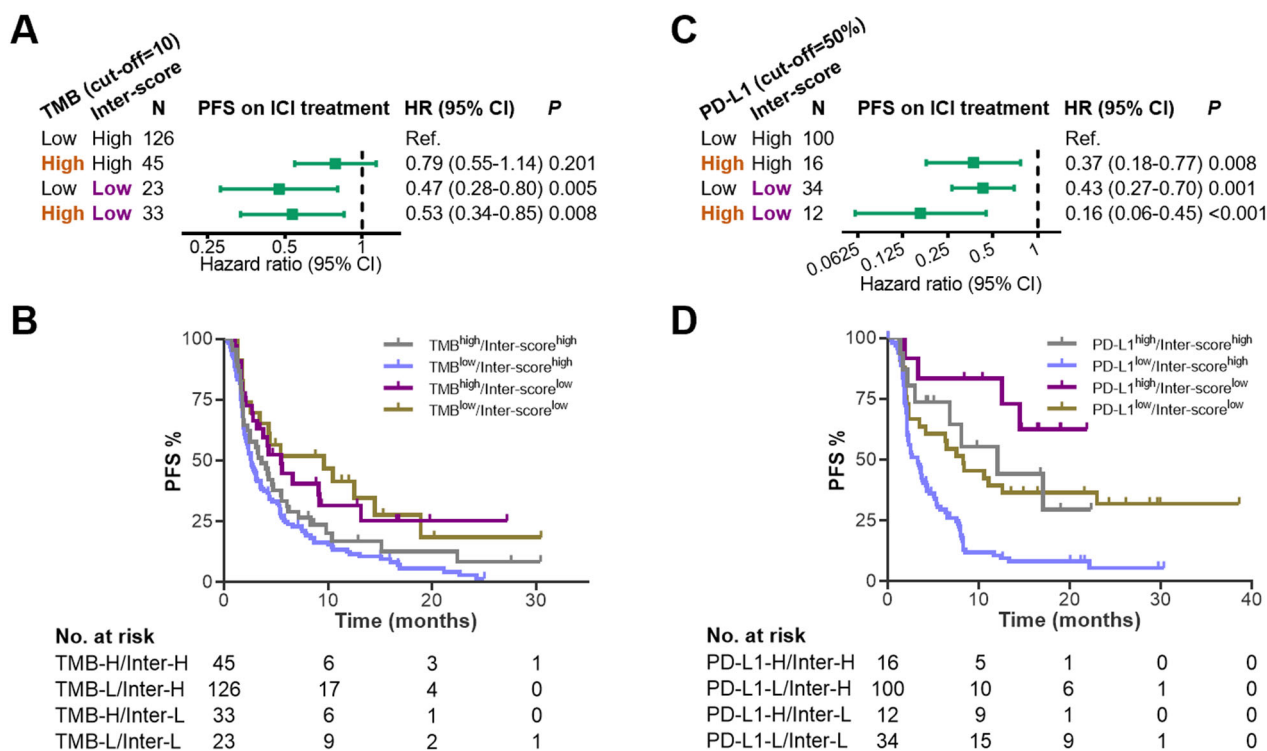

**A-B.** Predictive effectiveness of the inter-scores in the NSCLC patients with TMB $\geq$ 10 (A) or PD-L1 $\geq$ 50% (B).

Abbreviations: ICI=immune checkpoint inhibitor, NSCLC=non-small cell lung cancer, PD-L1=programmed death-ligand 1, PFS=progression-free survival, TMB=tumor mutational burden.



## Supplemental Tables

**Supplementary Table 1. Clinical cohorts analyzed in this study.**

| Cohort                   | NCC                                           | SYSUCC                                        | DFCI                                                                                                               | POPLAR/OAK                                                         | MSKCC-34                                                                                                                          | MSKCC-240                                                                      | MSKCC-75                                                                                                                          | MSKCC-350                                                                      |
|--------------------------|-----------------------------------------------|-----------------------------------------------|--------------------------------------------------------------------------------------------------------------------|--------------------------------------------------------------------|-----------------------------------------------------------------------------------------------------------------------------------|--------------------------------------------------------------------------------|-----------------------------------------------------------------------------------------------------------------------------------|--------------------------------------------------------------------------------|
| <b>Journal</b>           | <i>JAMA Oncol</i> <sup>5</sup>                | <i>CCR</i> <sup>13</sup>                      | <i>Nat Genet</i> <sup>14</sup>                                                                                     | <i>Nat Med</i> <sup>6</sup>                                        | <i>Science</i> <sup>11</sup>                                                                                                      | <i>JCO</i> <sup>7</sup>                                                        | <i>Cancer Cell</i> <sup>12</sup>                                                                                                  | <i>Nat Genet</i> <sup>15</sup>                                                 |
| <b>Year</b>              | 2019                                          | 2019                                          | 2018                                                                                                               | 2018                                                               | 2015                                                                                                                              | 2018                                                                           | 2018                                                                                                                              | 2019                                                                           |
| <b>Regimen</b>           | Anti-PD-1/PD-L1                               | Anti-PD-1/PD-L1                               | Anti-PD-1/PD-L1                                                                                                    | Atezolizumab vs. docetaxel (RCT, no crossover)                     | Pembrolizumab                                                                                                                     | Anti-PD-1/PD-L1, or combined with anti-CTLA-4                                  | Nivolumab + Ipilimumab                                                                                                            | Anti-CTLA4, anti-PD-1/PD-L1 or combination                                     |
| <b>Setting</b>           | Real-world                                    | Real-world                                    | Not mentioned                                                                                                      | Clinical trial                                                     | Clinical trial                                                                                                                    | Clinical trial and real-world                                                  | Clinical trial                                                                                                                    | Clinical trial and real-world                                                  |
| <b>Cancer type</b>       | NSCLC                                         | NSCLC                                         | Pan-cancer                                                                                                         | NSCLC                                                              | NSCLC                                                                                                                             | NSCLC                                                                          | NSCLC                                                                                                                             | Pan-cancer                                                                     |
| <b>No. of NSCLC pts</b>  | 64                                            | 73                                            | 56                                                                                                                 | 853                                                                | 34                                                                                                                                | 240                                                                            | 75                                                                                                                                | 350                                                                            |
| <b>Treatment lines</b>   | First to subsequent                           | First to subsequent                           | Not mentioned                                                                                                      | Second/third                                                       | Not mentioned                                                                                                                     | First to subsequent                                                            | Not mentioned                                                                                                                     | Not mentioned                                                                  |
| <b>Outcome</b>           | ORR, PFS, OS                                  | ORR, PFS                                      | ORR, PFS, OS                                                                                                       | ORR, PFS, OS                                                       | ORR, PFS                                                                                                                          | ORR, PFS                                                                       | ORR, PFS                                                                                                                          | OS                                                                             |
| <b>PD-L1 IHC testing</b> | Ventana SP263                                 | Dako 22C3                                     | /                                                                                                                  | Ventana SP142 (in OAK trial)                                       | Dako 22C3                                                                                                                         | /                                                                              | Dako 28-8                                                                                                                         | /                                                                              |
|                          | Blood sample                                  | Tissue sample                                 | Tissue sample                                                                                                      | Blood sample                                                       | Tissue sample                                                                                                                     | Tissue sample                                                                  | Tissue sample                                                                                                                     | Tissue sample                                                                  |
| <b>NGS testing</b>       | SNV                                           | SNV                                           | SNV                                                                                                                | SNV                                                                | SNV                                                                                                                               | SNV, CNV, fusion                                                               | SNV                                                                                                                               | SNV, fusion                                                                    |
|                          | 3D Medicines panel: 150-gene                  | Whole-exome sequencing                        | Whole-exome sequencing                                                                                             | Foundation One panel: 315-gene, 1.1 Mb                             | Whole-exome sequencing                                                                                                            | MSKCC panel: 341-gene, 56 pts; 410-gene, 164 pts; 468-gene, 20 pts             | Whole-exome sequencing                                                                                                            | MSKCC panel: 341-gene, 56 pts; 410-gene, 239 pts; 468-gene, 55 pts             |
| <b>Source of data</b>    | ●Sending request to the corresponding authors | ●Sending request to the corresponding authors | ●Supplemental Materials<br>●Newly sequenced samples are available at dbGaP under accession number phs001565.v1.p1. | ●Supplemental Materials<br>●https://clinicalstudydatarequest.com/. | ●http://science.sciencemag.org/content/suppl/2015/03/11/science.aal348.DC1<br>●http://www.cbioportal.org/study?id=tmb_mskcc_2018. | ●Supplemental Materials<br>●http://www.cbioportal.org/study?id=tmb_mskcc_2018. | ●Supplemental Materials<br>●https://www.ebi.ac.uk/eva/?evastudy=PRJEB24995<br>●http://www.cbioportal.org/study?id=tmb_mskcc_2018. | ●Supplemental Materials<br>●http://www.cbioportal.org/study?id=tmb_mskcc_2018. |

Abbreviations: CNV=copy number variation, CTLA-4=cytotoxic T lymphocyte-associated antigen 4, DFCI=Dana Farber Cancer Institute, MSKCC=Memorial Sloan-Kettering Cancer Center, IHC=immunohistochemistry, NCC=National Cancer Center, NGS=next-generation sequencing, NSCLC=non-small cell lung cancer, ORR=overall response rate, OS=overall survival, PD-1=programmed death 1, PD-L1=programmed death-ligand 1, PFS=progression-free survival, SNV=single nucleotide variation, SYSUCC=Sun Yat-Sen University Cancer Center.

**Supplementary Table 2. Members of the analyzed signaling pathways.**

| <b>Pathway</b>               | <b>Gene list</b>                                                   |
|------------------------------|--------------------------------------------------------------------|
| RAS pathway                  | <i>KRAS NRAS BRAF</i>                                              |
| NOTCH pathway                | <i>NOTCH1 NOTCH2 NOTCH3 SPEN EP300 FBXW7 KDM5A</i>                 |
| WNT pathway                  | <i>LRP1B APC CTNNB1</i>                                            |
| Cell cycle pathway           | <i>RB1 CDKN2A JAK1 JAK2</i>                                        |
| PI3K pathway                 | <i>PIK3CA PTEN TSC1 TSC2 AKT1 AKT2 AKT3 MTOR RICTOR RPTOR</i>      |
| RTK pathway                  | <i>ERBB2 ERBB3 ERBB4 PDGFRA PDGFRB KDR FGFR1 FGFR2 FGFR3 FGFR4</i> |
| TGF-beta pathway             | <i>SMAD2 SMAD3 SMAD4 INHBA TGFBR2</i>                              |
| HRR pathway                  | <i>ATM BRCA1 BRCA2 PALB2 CDK12 ATR MUTYH</i>                       |
| SWI/SNF pathway              | <i>ARID1A ARID1B ARID2 PBRM1 SMARCA4</i>                           |
| Chromatin remodeling pathway | <i>SETD2 DOT1L EZH2</i>                                            |
| Hippo pathway                | <i>FAT1 FAT4 NF1 NF2</i>                                           |
| Hedgehog pathway             | <i>GLI1 SMO</i>                                                    |
| Other involved genes         | <i>EGFR ALK TP53 STK11 KEAP1 NFE2L2 RBM10 PTPRD</i>                |

Abbreviations: HRR=homologous recombination repair, RTK=receptor tyrosine kinase, SWI/SNF=switch-sucrose nonfermentable, TGF=transforming growth factor.

**Supplementary Table 3. The single mutations associated with PFS on anti-PD-(L)1 monotherapy in non-squamous NSCLCs.**

|                   | No. of mutated samples | HR (95% CI)      | P value |
|-------------------|------------------------|------------------|---------|
| <i>EGFR</i>       | 91                     | 1.53 (1.19-1.98) | 0.001   |
| <i>STK11</i>      | 115                    | 1.31 (1.03-1.67) | 0.026   |
| <i>PTPRD</i>      | 82                     | 0.56 (0.42-0.75) | <0.001  |
| NOTCH pathway     | 109                    | 0.72 (0.56-0.92) | 0.009   |
| <i>NOTCH1/2/3</i> | 70                     | 0.72 (0.54-0.96) | 0.025   |
| <i>LRP1B</i>      | 116                    | 0.77 (0.62-0.97) | 0.025   |
| PI3K pathway      | 145                    | 0.77 (0.62-0.96) | 0.022   |
| RTKs              | 153                    | 0.73 (0.59-0.90) | 0.004   |
| <i>SMAD4</i>      | 28                     | 1.60 (1.01-2.53) | 0.046   |
| HRR pathway       | 163                    | 0.77 (0.63-0.95) | 0.016   |
| <i>ATM</i>        | 64                     | 0.72 (0.54-0.97) | 0.029   |
| <i>ATR</i>        | 28                     | 0.62 (0.39-1.00) | 0.049   |
| <i>ARID2</i>      | 54                     | 0.69 (0.49-0.97) | 0.032   |
| Hippo pathway     | 143                    | 0.78 (0.62-0.97) | 0.023   |
| Hedgehog pathway  | 36                     | 0.60 (0.37-0.96) | 0.032   |

Abbreviations: CI=confidence interval, HR=hazard ratio, NSCLC=non-small cell lung cancer, PD-1=programmed death-1, PD-L1=programmed death-ligand 1, PFS=progression-free survival.

**Supplementary Table 4. The interaction effects of co-mutations associated with PFS on anti-PD-(L)1 monotherapy in non-squamous NSCLCs.**

| Mutational event 1 | Mutational event 2 | Interaction                |                  |         | Mutational event 1 |                  |         | Mutational event 2 |                  |         |
|--------------------|--------------------|----------------------------|------------------|---------|--------------------|------------------|---------|--------------------|------------------|---------|
|                    |                    | No. of co-mutation samples | HR (95% CI)      | P value | No. of event 1     | HR (95% CI)      | P value | No. of event 2     | HR (95% CI)      | P value |
| <i>EGFR</i>        | PI3K pathway       | 23                         | 0.43 (0.23-0.80) | 0.008   | 68                 | 2.06 (1.54-2.76) | <0.001  | 122                | 0.84 (0.66-1.07) | 0.156   |
| <i>TP53</i>        | <i>KRAS/HRAS</i>   | 82                         | 0.58 (0.37-0.88) | 0.012   | 272                | 1.03 (0.84-1.25) | 0.781   | 101                | 1.10 (0.84-1.43) | 0.493   |
| <i>TP53</i>        | <i>KRAS</i>        | 74                         | 0.51 (0.32-0.80) | 0.003   | 280                | 1.04 (0.86-1.27) | 0.685   | 101                | 1.10 (0.84-1.43) | 0.493   |
| <i>TP53</i>        | <i>ERBB4</i>       | 30                         | 0.36 (0.17-0.79) | 0.01    | 324                | 0.98 (0.82-1.17) | 0.795   | 12                 | 1.58 (0.86-2.90) | 0.137   |
| <i>TP53</i>        | <i>ARID1A</i>      | 21                         | 0.26 (0.11-0.64) | 0.003   | 333                | 0.97 (0.81-1.16) | 0.767   | 19                 | 1.46 (0.89-2.39) | 0.130   |
| <i>TP53</i>        | <i>NFI</i>         | 45                         | 0.50 (0.27-0.92) | 0.026   | 309                | 0.99 (0.83-1.19) | 0.924   | 24                 | 1.14 (0.73-1.78) | 0.562   |
| <i>PTPRD</i>       | <i>KRAS/HRAS</i>   | 29                         | 2.38 (1.28-4.41) | 0.006   | 53                 | 0.43 (0.30-0.63) | <0.001  | 154                | 0.79 (0.63-0.99) | 0.038   |
| <i>PTPRD</i>       | <i>KRAS</i>        | 29                         | 2.47 (1.33-4.61) | 0.004   | 53                 | 0.43 (0.30-0.62) | <0.001  | 146                | 0.76 (0.60-0.95) | 0.018   |
| <i>PTPRD</i>       | WNT pathway        | 25                         | 0.48 (0.26-0.91) | 0.025   | 57                 | 0.74 (0.52-1.06) | 0.103   | 127                | 1.05 (0.85-1.31) | 0.638   |
| RAS                | <i>NOTCH1/2/3</i>  | 26                         | 0.53 (0.28-1.00) | 0.049   | 157                | 0.98 (0.79-1.23) | 0.881   | 44                 | 0.91 (0.65-1.27) | 0.569   |
| KRAS               | <i>NOTCH1/2/3</i>  | 25                         | 0.50 (0.26-0.96) | 0.036   | 150                | 0.96 (0.77-1.20) | 0.725   | 45                 | 0.92 (0.66-1.28) | 0.625   |
| NOTCH pathway      | Cell cycle pathway | 21                         | 0.39 (0.19-0.82) | 0.013   | 88                 | 0.82 (0.63-1.07) | 0.143   | 58                 | 1.41 (1.03-1.92) | 0.030   |
| WNT pathway        | SWI/SNF            | 63                         | 0.61 (0.39-0.95) | 0.029   | 89                 | 1.06 (0.82-1.35) | 0.666   | 124                | 1.11 (0.86-1.43) | 0.412   |
| LRP1B              | SWI/SNF            | 50                         | 0.57 (0.35-0.93) | 0.024   | 66                 | 0.95 (0.72-1.25) | 0.726   | 137                | 1.12 (0.88-1.42) | 0.345   |
| Cell cycle pathway | HRR                | 29                         | 0.26 (0.14-0.49) | <0.001  | 50                 | 1.97 (1.41-2.75) | <0.001  | 134                | 0.91 (0.73-1.14) | 0.429   |

Abbreviations: CI=confidence interval, HR=hazard ratio, HRR=homologous recombination repair, NSCLC=non-small cell lung cancer, PD-1=programmed death-1, PD-L1=programmed death-ligand 1, PFS=progression-free survival, RTK=receptor tyrosine kinase.

**Supplementary Table 5. The single mutations associated with PFS on anti-PD-(L)1 monotherapy in squamous NSCLCs.**

|                   | No. of mutated samples | HR (95% CI)      | P value |
|-------------------|------------------------|------------------|---------|
| <i>NOTCH1/2/3</i> | 31                     | 0.65 (0.41-1.00) | 0.053   |
| <i>LRP1B</i>      | 45                     | 1.56 (1.09-2.24) | 0.016   |
| <i>RBI</i>        | 14                     | 1.77 (1.00-3.15) | 0.051   |
| PI3K pathway      | 63                     | 0.75 (0.53-1.05) | 0.092   |

Abbreviations: CI=confidence interval, HR=hazard ratio, NSCLC=non-small cell lung cancer, PD-1=programmed death-1, PD-L1=programmed death-ligand 1, PFS=progression-free survival.

**Supplementary Table 6. The interaction effects of co-occurring mutations associated with PFS on anti-PD-(L)1 monotherapy in non-squamous NSCLCs.**

| Mutational event 1 | Mutational event 2 | Interaction                |                  |         | Mutational event 1 |                  |         | Mutational event 2 |                   |         |
|--------------------|--------------------|----------------------------|------------------|---------|--------------------|------------------|---------|--------------------|-------------------|---------|
|                    |                    | No. of co-mutation samples | HR (95% CI)      | P value | No. of event 1     | HR (95% CI)      | P value | No. of event 2     | HR (95% CI)       | P value |
| <i>TP53</i>        | <i>NFE2L2</i>      | 28                         | 0.21 (0.06-0.74) | 0.016   | 107                | 1.37 (0.97-1.92) | 0.071   | 3                  | 3.71 (1.15-12.00) | 0.029   |
| <i>TP53</i>        | HRR pathway        | 30                         | 0.55 (0.25-1.19) | 0.129   | 105                | 1.43 (0.99-2.06) | 0.055   | 15                 | 1.31 (0.70-2.43)  | 0.396   |
| PI3K pathway       | Hippo pathway      | 25                         | 0.57 (0.27-1.18) | 0.130   | 38                 | 0.91 (0.59-1.39) | 0.664   | 28                 | 1.28 (0.83-1.98)  | 0.266   |

Abbreviations: CI=confidence interval, HR=hazard ratio, NSCLC=non-small cell lung cancer, PD-1=programmed death-1, PD-L1=programmed death-ligand 1, PFS=progression-free survival.

**Supplementary Table 7. Univariable-significant single mutational events and significant interactions based on the PFS data of the non-squamous NSCLCs in the training sets.**

|                    |  | Mutational event 1 |         |  |  |  |  |
|--------------------|--|--------------------|---------|--|--|--|--|
| Mutational event 1 |  | HR (95% CI)        | P value |  |  |  |  |
| <i>EGFR</i>        |  | 1.53 (1.19-1.98)   | 0.001   |  |  |  |  |
| <i>STK11</i>       |  | 1.31 (1.03-1.67)   | 0.026   |  |  |  |  |
| <i>PTPRD</i>       |  | 0.56 (0.42-0.75)   | <0.001  |  |  |  |  |
| PI3K signaling     |  | 0.77 (0.62-0.96)   | 0.022   |  |  |  |  |
| HRR signaling      |  | 0.77 (0.63-0.95)   | 0.016   |  |  |  |  |

  

|                      |                      | Mutational event 1 |         | Mutational event 2 |         | Interaction effect |         |
|----------------------|----------------------|--------------------|---------|--------------------|---------|--------------------|---------|
| Mutational event 1   | Mutational event 2   | HR (95% CI)        | P value | HR (95% CI)        | P value | HR (95% CI)        | P value |
| <i>EGFR</i>          | PI3K signaling       | 2.06 (1.54-2.76)   | <0.001  | 0.84 (0.66-1.07)   | 0.16    | 0.43 (0.23-0.80)   | 0.008   |
| <i>TP53</i>          | <i>KRAS</i>          | 1.04 (0.86-1.27)   | 0.69    | 1.10 (0.84-1.43)   | 0.49    | 0.51 (0.32-0.80)   | 0.003   |
| <i>TP53</i>          | <i>ERBB4</i>         | 0.98 (0.82-1.17)   | 0.80    | 1.58 (0.86-2.90)   | 0.14    | 0.36 (0.17-0.79)   | 0.010   |
| Cell cycle signaling | HRR signaling        | 1.97 (1.41-2.75)   | <0.001  | 0.91 (0.73-1.14)   | 0.43    | 0.26 (0.14-0.49)   | <0.001  |
| PI3K signaling       | Chromatin remodeling | 0.96 (0.74-1.25)   | 0.76    | 0.98 (0.79-1.21)   | 0.83    | 0.59 (0.37-0.94)   | 0.026   |

Abbreviations: CI=confidence interval, HR=hazard ratio, NSCLC=non-small cell lung cancer, PFS=progression-free survival.

**Supplementary Table 8. Three prediction models based on the PFS on anti-PD-(L)1 monotherapy of the non-squamous NSCLCs in the training sets.**

|                              | <b>Variable</b>                           | <b>B (coefficient)</b> | <b>HR (95% CI)</b> | <b>P value</b>   |
|------------------------------|-------------------------------------------|------------------------|--------------------|------------------|
| Uni-model                    | <i>EGFR</i>                               | 0.476                  | 1.61 (1.24-2.09)   | <0.001           |
|                              | <i>STK11</i>                              | 0.292                  | 1.34 (1.05-1.70)   | 0.018            |
|                              | <i>PTPRD</i>                              | -0.475                 | 0.62 (0.46-0.85)   | 0.002            |
|                              | PI3K pathway                              | -0.234                 | 0.79 (0.63-0.99)   | 0.043            |
|                              | HRR pathway                               | -0.151                 | 0.86 (0.69-1.06)   | 0.165            |
|                              | <i>EGFR</i>                               | 0.635                  | 1.89 (1.40-2.55)   | <0.001           |
| Inter-model                  | <i>STK11</i>                              | 0.270                  | 1.31 (1.01-1.70)   | 0.043            |
|                              | <i>PTPRD</i>                              | -0.413                 | 0.66 (0.48-0.90)   | 0.010            |
|                              | PI3K pathway                              | 0.158                  | 1.17 (0.88-1.56)   | 0.285            |
|                              | HRR pathway                               | -0.024                 | 0.98 (0.78-1.23)   | 0.838            |
|                              | <i>TP53</i>                               | 0.092                  | 1.10 (0.89-1.35)   | 0.395            |
|                              | <i>KRAS</i>                               | 0.099                  | 1.10 (0.83-1.46)   | 0.490            |
|                              | <i>ERBB4</i>                              | 0.445                  | 1.56 (0.84-2.89)   | 0.157            |
|                              | Cell cycle pathway                        | 0.599                  | 1.82 (1.29-2.57)   | <0.001           |
|                              | Chromatin remodeling pathway              | -0.028                 | 0.97 (0.77-1.22)   | 0.812            |
|                              | <i>EGFR</i> *PI3K pathway                 | -0.915                 | 0.40 (0.21-0.75)   | 0.005            |
|                              | <i>TP53</i> * <i>KRAS</i>                 | -0.554                 | 0.57 (0.36-0.93)   | 0.024            |
|                              | <i>TP53</i> * <i>ERBB4</i>                | -0.735                 | 0.48 (0.22-1.07)   | 0.071            |
|                              | HRR pathway*Cell cycle pathway            | -1.113                 | 0.33 (0.17-0.62)   | <0.001           |
|                              | PI3K pathway*Chromatin remodeling pathway | -0.474                 | 0.62 (0.39-1.00)   | 0.052            |
|                              | Null-inter-model                          | <i>EGFR</i>            | 0.444              | 1.56 (1.19-2.04) |
| <i>STK11</i>                 |                                           | 0.350                  | 1.42 (1.10-1.83)   | 0.006            |
| <i>PTPRD</i>                 |                                           | -0.448                 | 0.64 (0.47-0.87)   | 0.005            |
| PI3K pathway                 |                                           | -0.205                 | 0.82 (0.65-1.03)   | 0.081            |
| HRR pathway                  |                                           | -0.157                 | 0.85 (0.69-1.07)   | 0.162            |
| <i>TP53</i>                  |                                           | -0.038                 | 0.96 (0.80-1.16)   | 0.686            |
| <i>KRAS</i>                  |                                           | -0.148                 | 0.86 (0.69-1.07)   | 0.184            |
| <i>ERBB4</i>                 |                                           | -0.171                 | 0.84 (0.57-1.24)   | 0.384            |
| Cell cycle pathway           |                                           | 0.163                  | 1.18 (0.88-1.58)   | 0.279            |
| Chromatin remodeling pathway |                                           | -0.141                 | 0.87 (0.71-1.07)   | 0.176            |

Abbreviations: CI=confidence interval, HR=hazard ratio, NSCLC=non-small cell lung cancer, PD-L1=programmed death-1, PD-L1=programmed death-ligand 1, PFS=progression-free survival.



**Supplementary Table 9. Univariable-significant single mutational events and significant interactions based on the PFS data of the squamous NSCLCs in the training sets.**

| Mutational event 1 | Mutational event 1 |         |
|--------------------|--------------------|---------|
|                    | HR (95% CI)        | P value |
| <i>NOTCH1/2/3</i>  | 0.65 (0.41-1.00)   | 0.053   |
| <i>LRP1B</i>       | 1.56 (1.09-2.24)   | 0.016   |
| <i>RB1</i>         | 1.77 (1.00-3.15)   | 0.051   |
| PI3K signaling     | 0.75 (0.53-1.05)   | 0.092   |

  

| Mutational event 1 | Mutational event 2 | Mutational event 1 |         | Mutational event 2 |         | Interaction effect |         |
|--------------------|--------------------|--------------------|---------|--------------------|---------|--------------------|---------|
|                    |                    | HR (95% CI)        | P value | HR (95% CI)        | P value | HR (95% CI)        | P value |
| <i>TP53</i>        | <i>NFE2L2</i>      | 1.37 (0.97-1.92)   | 0.071   | 3.71 (1.15-12.00)  | 0.029   | 0.21 (0.06-0.74)   | 0.016   |
| <i>TP53</i>        | <i>HRR</i>         | 1.43 (0.99-2.06)   | 0.055   | 1.31 (0.70-2.43)   | 0.40    | 0.55 (0.25-1.19)   | 0.13    |

Abbreviations: CI=confidence interval, HR=hazard ratio, NSCLC=non-small cell lung cancer, PFS=progression-free survival.

**Supplementary Table 10. Three prediction models based on the PFS on anti-PD-(L)1 monotherapy of the squamous NSCLCs in the training sets.**

|                  | <b>Variable</b>   | <b>B (coefficient)</b> | <b>HR (95% CI)</b> | <b>P value</b> |
|------------------|-------------------|------------------------|--------------------|----------------|
| Uni-model        | <i>NOTCH1/2/3</i> | -0.398                 | 0.67 (0.43-1.05)   | 0.080          |
|                  | <i>LRP1B</i>      | 0.493                  | 1.64 (1.14-2.36)   | 0.008          |
|                  | <i>RBI</i>        | 0.482                  | 1.62 (0.91-2.89)   | 0.102          |
|                  | PI3K pathway      | -0.310                 | 0.73 (0.52-1.04)   | 0.078          |
| Inter-model      | <i>NOTCH1/2/3</i> | -0.322                 | 0.72 (0.46-1.14)   | 0.165          |
|                  | <i>LRP1B</i>      | 0.521                  | 1.68 (1.14-2.49)   | 0.009          |
|                  | <i>RBI</i>        | 0.543                  | 1.72 (0.95-3.12)   | 0.074          |
|                  | PI3K pathway      | -0.251                 | 0.78 (0.55-1.11)   | 0.163          |
|                  | <i>TP53</i>       | 0.352                  | 1.42 (0.98-2.07)   | 0.067          |
|                  | <i>NFE2L2</i>     | 0.913                  | 2.49 (0.69-8.96)   | 0.162          |
|                  | HRR pathway       | 0.206                  | 1.23 (0.63-2.38)   | 0.542          |
|                  | TP53*NFE2L2       | -1.210                 | 0.30 (0.08-1.16)   | 0.082          |
|                  | TP53*HRR pathway  | -0.509                 | 0.60 (0.26-1.39)   | 0.235          |
|                  | <i>NOTCH1/2/3</i> | -0.362                 | 0.70 (0.44-1.09)   | 0.117          |
| Null-inter-model | <i>LRP1B</i>      | 0.504                  | 1.66 (1.13-2.43)   | 0.010          |
|                  | <i>RBI</i>        | 0.471                  | 1.60 (0.89-2.89)   | 0.118          |
|                  | PI3K pathway      | -0.308                 | 0.74 (0.52-1.04)   | 0.085          |
|                  | <i>TP53</i>       | 0.200                  | 1.22 (0.87-1.72)   | 0.248          |
|                  | <i>NFE2L2</i>     | -0.184                 | 0.83 (0.52-1.34)   | 0.447          |
|                  | HRR pathway       | -0.089                 | 0.91 (0.62-1.35)   | 0.657          |

Abbreviations: CI=confidence interval, HR=hazard ratio, NSCLC=non-small cell lung cancer, PD-1=programmed death-1, PD-L1=programmed death-ligand 1, PFS=progression-free survival.

## References

- 1 Chen, J. *et al.* Genomic landscape of lung adenocarcinoma in East Asians. *Nat Genet* **52**, 177-186, doi:10.1038/s41588-019-0569-6 (2020).
- 2 Xu, J. Y. *et al.* Integrative Proteomic Characterization of Human Lung Adenocarcinoma. *Cell* **182**, 245-261 e217, doi:10.1016/j.cell.2020.05.043 (2020).
- 3 Gillette, M. A. *et al.* Proteogenomic Characterization Reveals Therapeutic Vulnerabilities in Lung Adenocarcinoma. *Cell* **182**, 200-225 e235, doi:10.1016/j.cell.2020.06.013 (2020).
- 4 Schoenfeld, A. J. *et al.* Clinical and molecular correlates of PD-L1 expression in patients with lung adenocarcinomas. *Ann Oncol*, doi:10.1016/j.annonc.2020.01.065 (2020).
- 5 Wang, Z. *et al.* Assessment of Blood Tumor Mutational Burden as a Potential Biomarker for Immunotherapy in Patients With Non-Small Cell Lung Cancer With Use of a Next-Generation Sequencing Cancer Gene Panel. *JAMA Oncol*, doi:10.1001/jamaoncol.2018.7098 (2019).
- 6 Gandara, D. R. *et al.* Blood-based tumor mutational burden as a predictor of clinical benefit in non-small-cell lung cancer patients treated with atezolizumab. *Nat Med* **24**, 1441-1448, doi:10.1038/s41591-018-0134-3 (2018).
- 7 Rizvi, H. *et al.* Molecular Determinants of Response to Anti-Programmed Cell Death (PD)-1 and Anti-Programmed Death-Ligand 1 (PD-L1) Blockade in Patients With Non-Small-Cell Lung Cancer Profiled With Targeted Next-Generation Sequencing. *J Clin Oncol* **36**, 633-641, doi:10.1200/JCO.2017.75.3384 (2018).
- 8 Munari, E. *et al.* PD-L1 expression in non-small cell lung cancer: evaluation of the diagnostic accuracy of a laboratory-developed test using clone E1L3N in comparison with 22C3 and SP263 assays. *Hum Pathol* **90**, 54-59, doi:10.1016/j.humpath.2019.05.003 (2019).
- 9 Adam, J. *et al.* Multicenter harmonization study for PD-L1 IHC testing in non-small-cell lung cancer. *Ann Oncol* **29**, 953-958, doi:10.1093/annonc/mdy014 (2018).
- 10 Newman, A. M. *et al.* Robust enumeration of cell subsets from tissue expression profiles. *Nat Methods* **12**, 453-457, doi:10.1038/nmeth.3337 (2015).
- 11 Rizvi, N. A. *et al.* Cancer immunology. Mutational landscape determines sensitivity to PD-1 blockade in non-small cell lung cancer. *Science* **348**, 124-128, doi:10.1126/science.aaa1348 (2015).
- 12 Hellmann, M. D. *et al.* Genomic Features of Response to Combination Immunotherapy in Patients with Advanced Non-Small-Cell Lung Cancer. *Cancer Cell* **33**, 843-852 e844, doi:10.1016/j.ccell.2018.03.018 (2018).
- 13 Fang, W. *et al.* Comprehensive Genomic Profiling Identifies Novel Genetic Predictors of Response to Anti-PD-(L)1 Therapies in Non-Small Cell Lung Cancer. *Clin Cancer Res* **25**, 5015-5026, doi:10.1158/1078-0432.CCR-19-0585 (2019).
- 14 Miao, D. *et al.* Genomic correlates of response to immune checkpoint blockade in microsatellite-stable solid tumors. *Nat Genet* **50**, 1271-1281, doi:10.1038/s41588-018-0200-2 (2018).
- 15 Samstein, R. M. *et al.* Tumor mutational load predicts survival after immunotherapy across multiple cancer types. *Nat Genet* **51**, 202-206, doi:10.1038/s41588-018-0312-8 (2019).
